# Supplementary material for: The Management of Children with Cancer during the COVID-19 Pandemic: A Rapid Review
Source: PubMed Central journal article supplement (PMC7700610; doi:10.3390/jcm9113756), 2020-11-21
Supplement: jcm-09-03756-s001.pdf [file jcm-09-03756-s001.pdf]

Figure S1 - Flow chart of the literature review

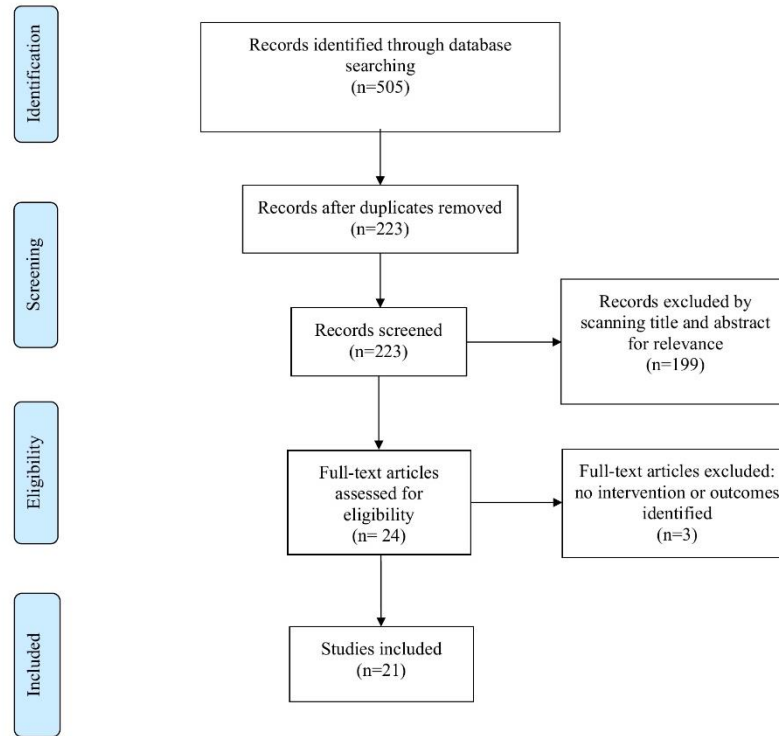

Figure S1. Flow chart of the literature review.

Supplementary Table S1 - Search Strategy

| Database | Search strategy                                                                                                                                                                                                                                                                                                                                                                                                                                                                                                                                                                                                                                                                                                                                                                                                                                                                                                                    | Identified Articles |
|----------|------------------------------------------------------------------------------------------------------------------------------------------------------------------------------------------------------------------------------------------------------------------------------------------------------------------------------------------------------------------------------------------------------------------------------------------------------------------------------------------------------------------------------------------------------------------------------------------------------------------------------------------------------------------------------------------------------------------------------------------------------------------------------------------------------------------------------------------------------------------------------------------------------------------------------------|---------------------|
| PUBMED   | <p>#1 (((((((("Child"[MeSH Terms]) OR "Children*") OR "Adolescent"[MeSH Terms]) OR "Pediatric?") OR "Pediatrics"[MeSH Terms])))</p> <p>#2 (((((((("cancer") OR "tumor") OR "neoplasms" [MeSH Terms]) OR "Medical Oncology" [MeSH Terms]) OR "Hematology" [MeSH Terms]) OR "Oncology Service, Hospital" [MeSH Terms], OR "Oncology"))</p> <p>#3 #1 AND #2</p> <p>#4 (((((((((((((((("Education" OR "prevention[MeSH Subheading AND control"[MeSH Subheading])) OR "Intervention*") OR "prevention*") OR "Secondary Prevention"[MeSH Terms]) OR "Management*") OR "Disease Management"[MeSH Terms]) OR ("Organization and Administration"[MeSH Terms])) OR "Health Information Management"[MeSH Terms]) OR "Risk Management"[MeSH Terms]) OR "restraint*") OR ("Organization and Administration"[MeSH Terms])) OR "Management Service Organizations"[MeSH Terms]) OR "Organization*") OR "clinical strategies*") OR "managing*")</p> | 188                 |

|        |                                                                                                                                                                                                                                                                                                                                                                                                                                                                                                                                                                                                                                                          |     |
|--------|----------------------------------------------------------------------------------------------------------------------------------------------------------------------------------------------------------------------------------------------------------------------------------------------------------------------------------------------------------------------------------------------------------------------------------------------------------------------------------------------------------------------------------------------------------------------------------------------------------------------------------------------------------|-----|
|        | <p>#5 (((((((("COVID-19") OR "SARS-CoV-2") OR "nCoV") OR "2019 novel coronavirus") OR "2019-nCoV") OR "novel coronavirus"))</p> <p>#6 #3 AND #4 AND #5</p>                                                                                                                                                                                                                                                                                                                                                                                                                                                                                               |     |
| SCOPUS | <p>S1 ("Child*" OR "Adolescent" OR "Pediatric?" OR "Pediatrics")</p> <p>S2 ("cancer*" OR "tumor*" OR "neoplasms*" OR "Medical Oncology" OR "Hematology?" OR "Oncology Service, Hospital" OR "Oncology")</p> <p>S3 S1 AND S2</p> <p>S4 "education" OR "Intervention*" OR "prevention*" OR "Management*" OR "Disease Management" OR "Health Information Management" OR "Risk Management" OR "restraint*" OR "Management Service Organizations" OR "Organization*" OR "clinical strategies*" OR "managing*"</p> <p>S5 "COVID-19" OR "SARS-CoV-2" OR "nCoV" OR "2019 novel coronavirus" OR "2019-nCoV" OR "novel coronavirus"</p> <p>S6 S3 AND S5 AND S5</p> | 144 |

|                  |                                                                                                                                                                                                                                                                                                                                                                                                                                                                                                                                                                                 |     |
|------------------|---------------------------------------------------------------------------------------------------------------------------------------------------------------------------------------------------------------------------------------------------------------------------------------------------------------------------------------------------------------------------------------------------------------------------------------------------------------------------------------------------------------------------------------------------------------------------------|-----|
| COCHRANE LIBRARY | Search by topic and by <i>review group</i>                                                                                                                                                                                                                                                                                                                                                                                                                                                                                                                                      | 3   |
| EMBASE           | <p>((("Child*" OR "Adolescent" OR "Pediatric?" OR "Pediatrics") AND ("cancer*" OR "tumor*" OR "neoplasms*" OR "Medical Oncology" OR "Hematology?" OR "Oncology Service, Hospital"))) AND ("Education" OR "Intervention*" OR "prevention*" OR "Management*" OR "Disease Management" OR "Health Information Management" OR "Risk Management" OR "restraint*" OR "Management Service Organizations" OR "Organization*" OR "clinical strategies*" OR "managing*") AND ("COVID-19" OR "SARS-CoV-2" OR "nCoV" OR "2019 novel coronavirus" OR "2019-nCoV" OR "novel coronavirus"))</p> | 170 |

Supplementary Table S2 - COVID-19 interventions by description in the included studies.

| Preventive interventions                            |           |     |              |           |                                                                      |                                                                   |                                                           |                  |                                         |                 |                |                       |                                            |                                                                           |                   |  |
|-----------------------------------------------------|-----------|-----|--------------|-----------|----------------------------------------------------------------------|-------------------------------------------------------------------|-----------------------------------------------------------|------------------|-----------------------------------------|-----------------|----------------|-----------------------|--------------------------------------------|---------------------------------------------------------------------------|-------------------|--|
| Author                                              | Screening | PPE | Hand hygiene | Isolation | Management:<br>Chemotherapy (a),<br>Radiotherapy (b),<br>Surgery (c) | Telephone support (d),<br>Online support (e),<br>Telemedicine (f) | Limitation: Parents (g),<br>Carers (h),<br>Volunteers (i) | Health education | Temperature detection (j),<br>Swabs (k) | Dedicated staff | Waste disposal | Psychological support | Pulmonary CT (l),<br>Nucleic acid test (m) | Dedicated pathways (n),<br>Move follow-up visits (o)<br>Visit bedside (n) | HSCT postponement |  |
| Subspecialty Group of Hematology and Oncology, 2020 | X         | X   | X            | X         | a                                                                    | e,f                                                               | g                                                         | X                | j,k                                     |                 | X              | l                     |                                            |                                                                           |                   |  |
| Yang et al., 2020                                   | X         | X   | X            | X         | a,b,c                                                                |                                                                   |                                                           | X                | k                                       |                 | X              |                       |                                            |                                                                           |                   |  |
| Kotecha, 2020                                       | X         | X   | X            | X         |                                                                      | g                                                                 | g,h,i                                                     |                  | k                                       |                 |                |                       |                                            | o                                                                         |                   |  |
| Bouffet et al., 2020                                | X         | X   | X            | X         |                                                                      | d,e,f,                                                            | g                                                         |                  | k                                       |                 |                |                       |                                            | o                                                                         |                   |  |
| Balduzzi et al., 2020                               | X         | X   | X            | X         | a                                                                    | d,e                                                               | g,i                                                       | X                | j,k                                     | X               |                | X                     |                                            | n,o,p                                                                     | X                 |  |
| He et al., 2020                                     | X         | X   | X            | X         | a,b,c                                                                |                                                                   | h                                                         | X                | k                                       | X               | X              |                       | m                                          | n                                                                         |                   |  |
| Hrusak et al., 2020                                 | X         | X   | X            | X         | a,b                                                                  |                                                                   |                                                           |                  | j,k                                     | X               |                |                       |                                            |                                                                           |                   |  |
| Saab et al., 2020                                   |           | X   | X            | X         | a,b,c                                                                |                                                                   |                                                           |                  |                                         |                 |                |                       |                                            | n,o                                                                       |                   |  |
| Cassoux, 2020                                       |           |     | X            | X         |                                                                      |                                                                   |                                                           |                  |                                         |                 |                |                       |                                            | n,o                                                                       |                   |  |
| Manjandavida et al., 2020                           |           |     |              |           | a,b,c                                                                |                                                                   |                                                           |                  |                                         |                 |                |                       |                                            | n,o                                                                       |                   |  |
| Trehan et al., 2020                                 |           |     |              | X         |                                                                      | d,e                                                               |                                                           |                  |                                         | X               |                |                       |                                            | n,o                                                                       |                   |  |

|                       |   |   |   |   |       |     |       |   |     |   |   |     |     |   |
|-----------------------|---|---|---|---|-------|-----|-------|---|-----|---|---|-----|-----|---|
| Cai et al., 2020      | X | X | X | X | a,c   |     |       | X |     | X |   |     | n   |   |
| Iehara et al., 2020   | X |   | X | X | a,b   |     |       |   |     |   |   |     |     | X |
| Sullivan et al., 2020 |   | X | X | X | c     | d,f | g,h   | X | k   | X | X | X   | o   | X |
| Blinded, Yearb        | X | X | X | X |       | d   | g,h,i |   |     |   |   |     | n,o | X |
| Baruchel et al., 2020 |   | X | X | X | a,b,c |     |       |   | k   |   |   | l,m |     |   |
| Ruggiero et al., 2020 |   | X | X | X | a     | f   | g,h   |   |     | X |   |     |     |   |
| Seth, 2020            |   | X | X | X | a,b,c |     |       |   |     | X |   |     | n,o |   |
| Blinded, Yeara        |   | X | X | X |       |     |       | X | k   |   | X |     |     |   |
| Kaspers, 2020         |   |   |   | X |       |     | g,h   |   | k   |   |   |     | o   |   |
| Sainati & Biffi, 2020 | X | X | X | X | a     | d   | g,h,i | X | j,k | X | X |     | n,o | X |

Abbreviations:

PPE, personal protection equipment

CT, computed tomography

HSCT, Hematopoietic stem cell transplant
